# Supplementary material for: The metal–support interaction induced catalytic activity enhancement of Pt/TiO2 for hydrogen production from formic acid
Source: Royal Society of Chemistry journal article supplement (doi:10.1039/d4nj03129f), 2024-01-01
Supplement: d4nj03129f1.pdf [file d4nj03129f1.pdf]

NJC

## Electronic Supplementary Information

### The metal-support interactions induced catalytic activity enhancement of Pt/TiO<sub>2</sub> for hydrogen production from formic acid

Jiaping Cai,<sup>ab</sup> Sifan Liu,<sup>a</sup> Xuejing Wang,<sup>a</sup> Xiaohui Huang,<sup>\*b</sup> Juan Xu<sup>a</sup> and Yanhui Zhang<sup>\*ab</sup>

<sup>a</sup> College of Chemistry, Chemical Engineering and Environment, Fujian Province Key Laboratory of Morden Analytical Science and Separation Technology, Minnan Normal University, Zhangzhou, 363000, P.R. China

<sup>b</sup> Fujian Province Key Laboratory of Featured Biochemical, College of Chemistry and Materials, Ningde Normal University, Ningde, 352100, P.R. China

\*To whom correspondence should be addressed. E-mail Address: zhangyh@mnnu.edu.cn (Y. Zhang)

\*To whom correspondence should be addressed. E-mail Address: hxh@ndnu.edu.cn (X. Huang)

$$TOF = \frac{P_{atm}V}{RTn_{Pt}t}$$

Equation S1

Equation S1 provides insights into the catalytic efficiency of Au/TiO<sub>2</sub>, Pd/TiO<sub>2</sub>, and Pt/TiO<sub>2</sub> based on their turnover frequency (TOF) at a specific conversion level of formic acid to hydrogen. Here,  $P_{atm}$  signifies the ambient pressure (101325 Pa),  $R$  is the universal gas constant (8.314 m<sup>3</sup>·Pa/(mol·K)),  $V$  represents the volume of hydrogen generated,  $n_{Pt}$  denotes the moles of Pt,  $t$  corresponds to a reaction duration of 5 hours, and  $T$  stands for the reaction temperature set at 333K.

**Table S1** Comparison of various catalysts utilized in the dehydrogenation of formic acid.

| Catalyst            | T/K | Reactants                      | TOF/h <sup>-1</sup> | Reference |
|---------------------|-----|--------------------------------|---------------------|-----------|
| Pd/PPy-S1           | 333 | formic acid and sodium formate | 8.60                | 46        |
| Pd/PPy-S2           | 333 | formic acid and sodium formate | 7.40                | 46        |
| Au/MgAl-LDH         | 333 | formic acid and sodium formate | 4.10                | 47        |
| Pd/C                | 303 | formic acid and sodium formate | 36.00               | 67        |
| Au/TiO <sub>2</sub> | 333 | formic acid and sodium formate | 36.76               | This work |
| Pd/TiO <sub>2</sub> | 333 | formic acid and sodium formate | 28.04               | This work |
| Pt/TiO <sub>2</sub> | 333 | formic acid and sodium formate | 57.83               | This work |

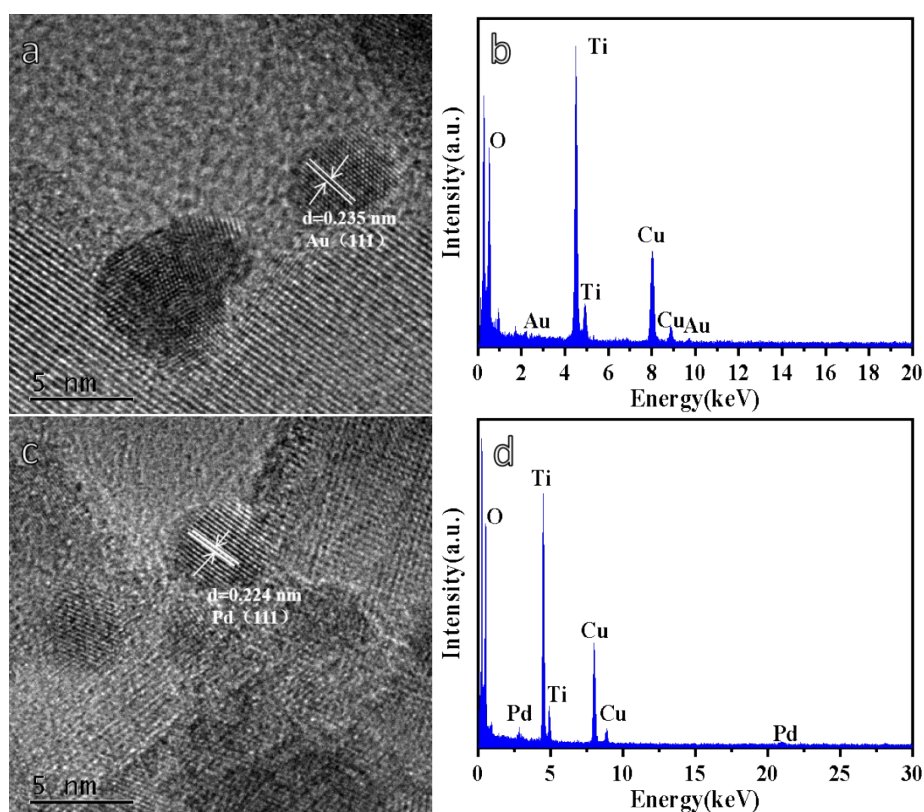**Fig. S1** HRTEM images and EDS spectra of Au/TiO<sub>2</sub> (a,b) and Pd/TiO<sub>2</sub> (c,d).

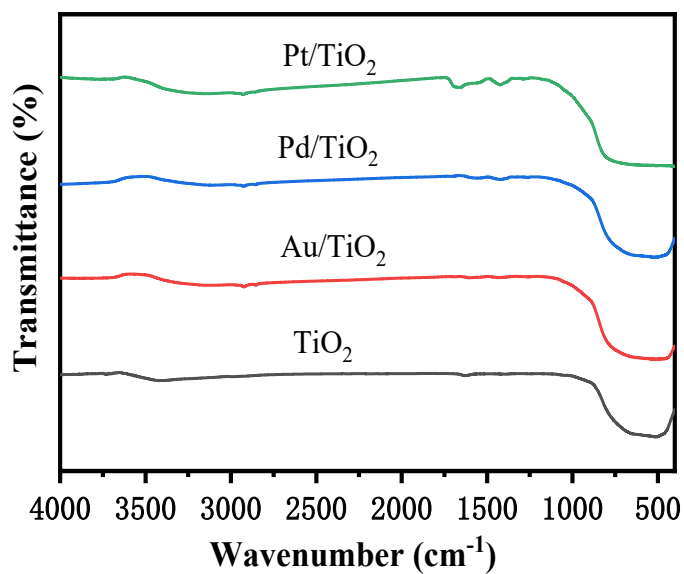

Fig. S2 FT-IR spectra of TiO<sub>2</sub>, Au/TiO<sub>2</sub>, Pd/TiO<sub>2</sub>, and Pt/TiO<sub>2</sub>.

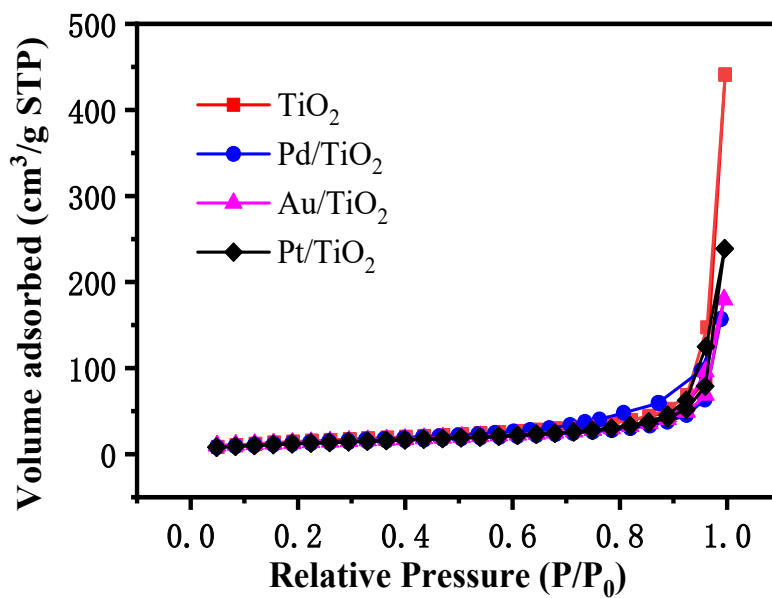

Fig. S3 The N<sub>2</sub> adsorption-desorption isotherms of TiO<sub>2</sub>, Au/TiO<sub>2</sub>, Pd/TiO<sub>2</sub>, Pt/TiO<sub>2</sub>.
